# Supplementary material for: Age and Sex Differences in Heart Rate Variability and Vagal Specific Patterns – Baependi Heart Study
Source: PubMed Central journal article supplement (PMC7583712; doi:10.5334/gh.873), 2020-10-21
Supplement: gh-15-1-873-s1.pdf [file gh-15-1-873-s1.pdf]

## Supplemental Material - Appendix A

**Table A1. Characteristics of the Full Sample (all complete 24hour-Holter ECG) at the second wave evaluation period (from 2010 to 2016)**

|                                    | <b>Full sample<br/>(24hour-Holter ECG)<br/>n= 1,287</b> |
|------------------------------------|---------------------------------------------------------|
| <b>Age, y</b>                      | 48 ±16                                                  |
| <b>Sex (Male), %</b>               | 37                                                      |
| <b>Race, %</b>                     |                                                         |
| White                              | 71                                                      |
| Black                              | 7                                                       |
| Other                              | 22                                                      |
| <b>Smoking, %</b>                  |                                                         |
| Never                              | 67                                                      |
| Former                             | 20                                                      |
| Current                            | 13                                                      |
| <b>BMI, kg/m<sup>2</sup></b>       | 26 ±5                                                   |
| <b>Waist circumference, cm</b>     | 92 ±13                                                  |
| <b>Hip circumference, cm</b>       | 100 ±11                                                 |
| <b>Neck circumference, cm</b>      | 36 ±4                                                   |
| <b>Total cholesterol, mg/dL</b>    | 20 ±42                                                  |
| <b>LDL-chol, mg/dL</b>             | 124 ±36                                                 |
| <b>HDL-chol, mg/dL</b>             | 47 ±11                                                  |
| <b>Triglycerides, mg/dL</b>        | 143 ±83                                                 |
| <b>Glucose, mg/dL</b>              | 94 ±23                                                  |
| <b>HbA1c, %</b>                    | 5.60 ±0,90                                              |
| <b>Creatinine, mg/dL</b>           | 0.87 ±0.20                                              |
| <b>HTN, %</b>                      | 36                                                      |
| <b>DM, %</b>                       | 7                                                       |
| <b>Mean 24h-Systolic BP, mmHg</b>  | 118 ±11                                                 |
| <b>Mean 24h-Diastolic BP, mmHg</b> | 73 ±8                                                   |
| <b>Medication, %</b>               |                                                         |
| Antihypertensive                   | 31                                                      |
| Oral hypoglycemic                  | 6                                                       |
| Statin                             | 12                                                      |
| BB use                             | 9                                                       |

Data are shown as mean ±SD for continuous and percentage for categorical variables. ECG= electrocardiogram, BMI= body mass index, chol= cholesterol; LDL= low-density lipoprotein; HDL= high-density lipoprotein; HbA1c= glycated hemoglobin; HTN= hypertension; DM= diabetes Mellitus; BP= blood pressure.; BB= beta blocker.

**Table A2. 24 Hour-Holter ECG Characteristics**

|                              | <b>“Healthy” sample<br/>(n= 543)</b> | <b>Full sample<br/>(24-hour-Holter ECG)<br/>(n= 1,287)</b> |
|------------------------------|--------------------------------------|------------------------------------------------------------|
| <b>Min HR, bpm</b>           | 50±7                                 | 51 ±7                                                      |
| <b>Mean HR, bpm</b>          | 79±9                                 | 78 ±9                                                      |
| <b>Max HR, bpm</b>           | 144±20                               | 139 ±231                                                   |
| <b>NN intervals, n°</b>      | 97,166 ±15,934                       | 95,462 ±17,382                                             |
| <b>mean NN intervals, ms</b> | 786±93                               | 796 ±100                                                   |
| <b>SDNN, ms</b>              | 146±37                               | 138 ±41                                                    |
| <b>SDANN, ms</b>             | 130±39                               | 123 ±39                                                    |
| <b>SDNN index, ms</b>        | 64±20                                | 59 ±25                                                     |
| <b>rMSSD, ms</b>             | 41±21                                | 40 ±27                                                     |
| <b>pNN50, %</b>              | 12±10                                | 10 ±10                                                     |
| <b>TINN, ms</b>              | 612±174                              | 567 ±181                                                   |

Data are shown as mean±SD. “Healthy” sample=excluded those under medication use, under BB use, obese (BMI  $\geq 30\text{kg/m}^2$ ), current smokers and diseases, such as HTN, DM, stroke, acute myocardial infarction, cancer, cardiac revascularization or angioplasty (see Appendix Figure A1). HR=heart rate; NN intervals = normal-to-normal intervals; SDNN=standard deviation of NN intervals; SDANN=standard deviation of the average of all consecutive 5-minute NN intervals; SDNN index=mean of the standard deviations of all normal sinus NN intervals for all 5-min segments; rMSSD=root mean square of successive difference of NN intervals; pNN50=percentage of consecutive NN intervals that deviate from one another by more than 50 ms; TINN=triangular interpolation of NN intervals; AFib=atrial fibrillation. No AFib patients and pacemaker subjects were in this subset.

**Table A3. Univariate Restricted Analysis of all Complete Data (resting ECG 10' protocol and 24h-Holter ECG) and Time Domain Measures by Groups**

| Total (N=1194)                                           | Healthy (n=513) | Unhealthy (n=681) | <i>P</i> -value |
|----------------------------------------------------------|-----------------|-------------------|-----------------|
| <b>Lie down 10'</b>                                      |                 |                   |                 |
| SDNN, ms                                                 | 49±20           | 40±18             | <0.001          |
| rMSSD, ms                                                | 36±20           | 30±19             | <0.001          |
| pNN50, %                                                 | 15±16           | 11±15             | <0.001          |
| <b>Standing 10'</b>                                      |                 |                   |                 |
| SDNN, ms                                                 | 46±17           | 40±18             | <0.001          |
| rMSSD, ms                                                | 21±10           | 21±14             | 0.638           |
| pNN50, %                                                 | 4±6             | 4±8               | 0.180           |
| <b>Time domain HRV measures from 24h-hour ECG Holter</b> |                 |                   |                 |
| SDNN, ms                                                 | 145±39          | 132±40            | <0.001          |
| rMSSD, ms                                                | 39±17           | 39±28             | 0.940           |
| pNN50, %                                                 | 11±9            | 9±10              | <0.001          |

Data are shown as mean ±SD for continuous variables. *P*-value by independent *t* test for continuous variables. ECG= electrocardiogram; HRV= heart rate variability; NN= normal-to-normal; SDNN= standard deviation of NN intervals; rMSSD= root mean square of successive difference of NN intervals; pNN50= percentage of consecutive NN intervals that deviate from one another by more than 50 ms;

**Figure A1. Exclusion criteria for the sample**

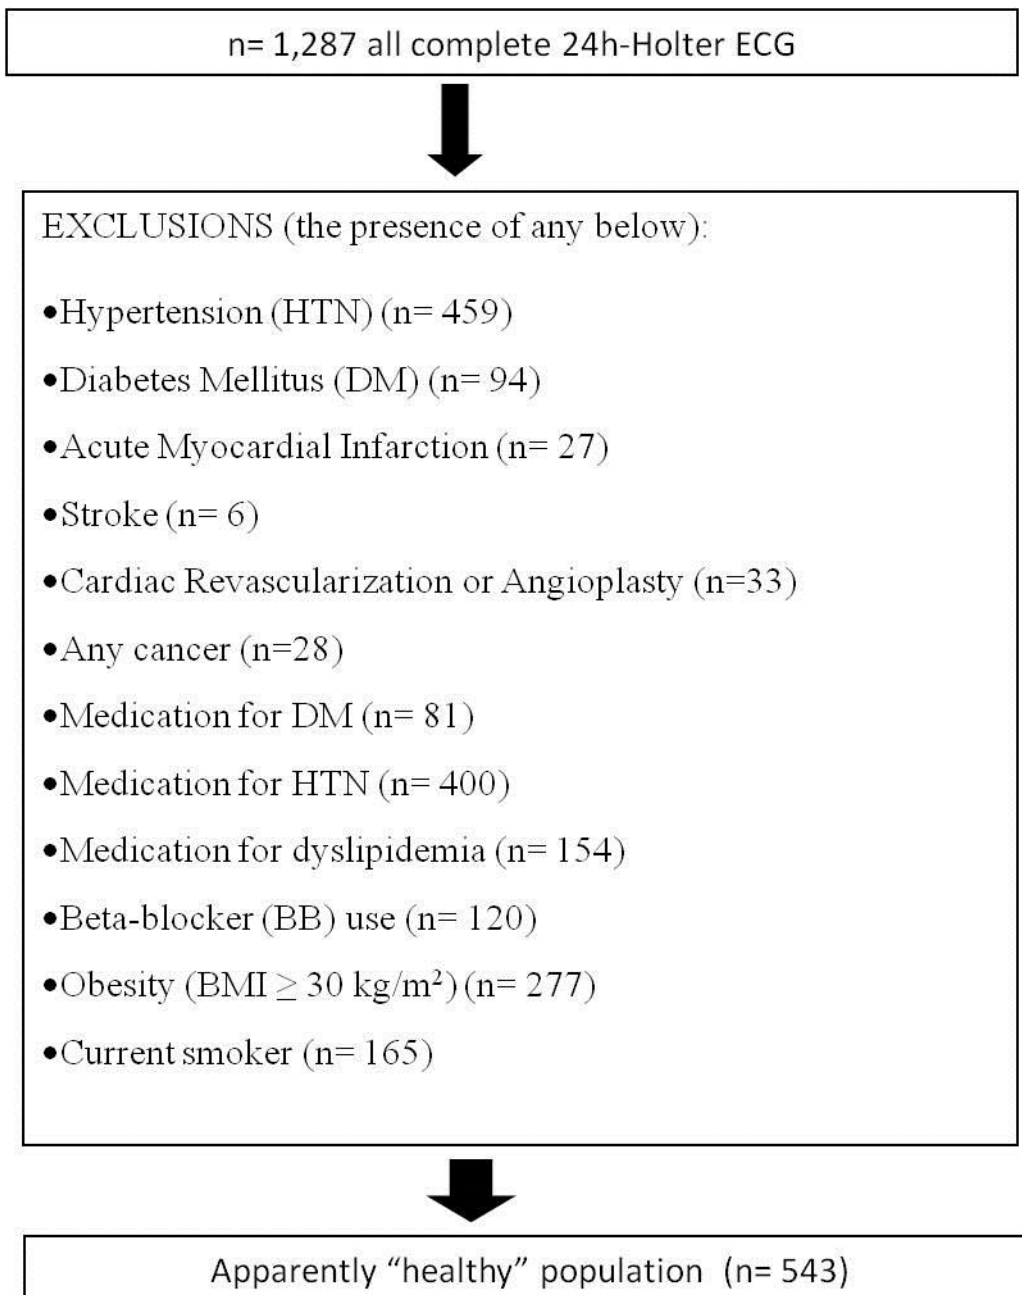

**Figure A2. HRV measures showing mean values by age-decade and race distribution of the “Healthy” sample (n=543)**

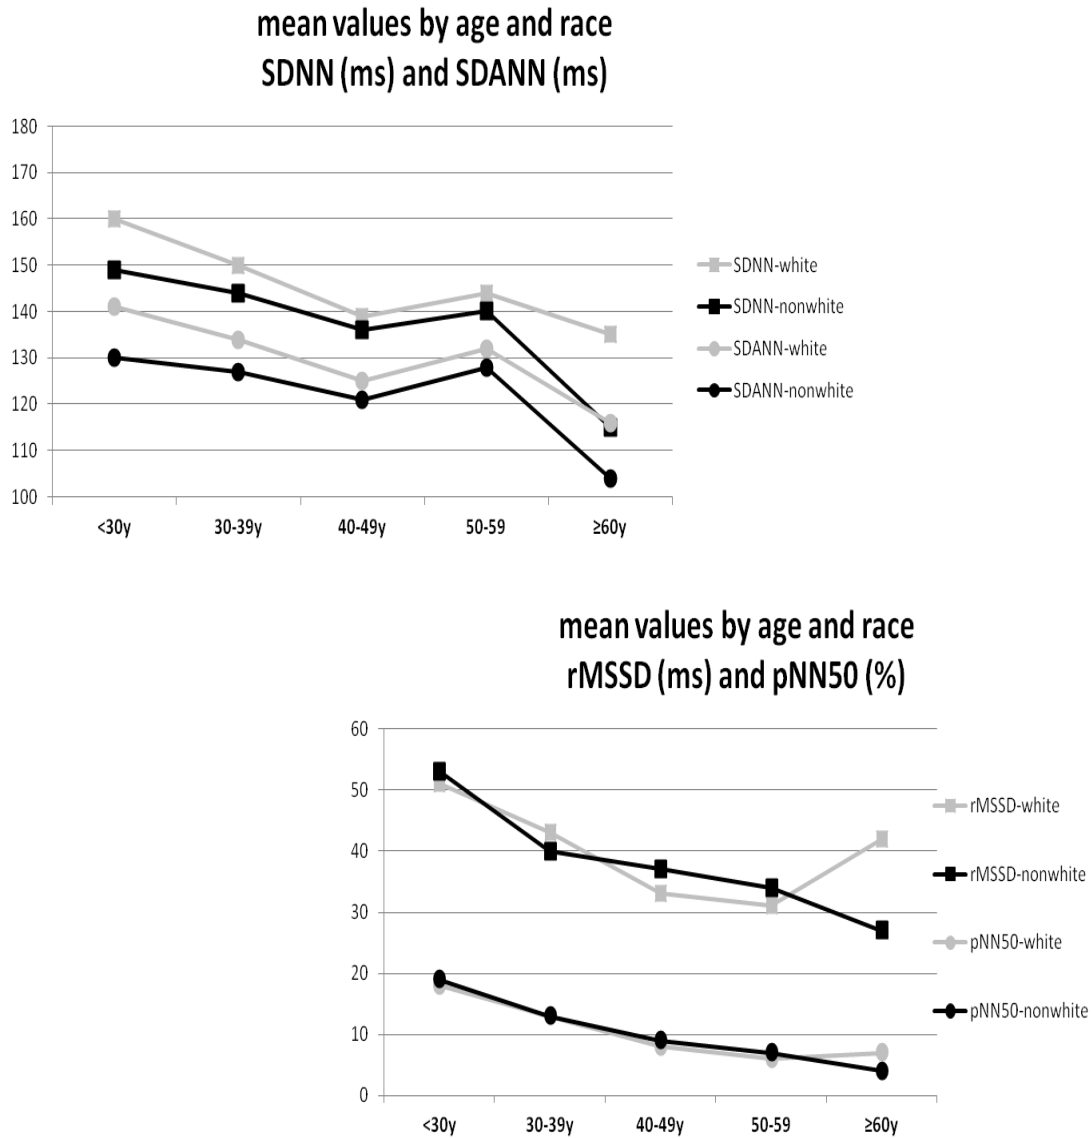

SDNN= standard deviation of NN intervals; SDANN= standard deviation of the average of all consecutive 5-minute NN intervals; rMSSD= root mean square of successive difference of NN intervals; pNN50= percentage of consecutive NN intervals that deviate from one another by more than 50 ms. Race (white versus non-white) white (n= 402) and non-white (n= 141). Age  $\geq 18$  and < 30y (n= 137); age 30-39y (n= 154); age 40-49y (n= 110); age 50-59y (n= 92); age  $\geq 60$ y (n= 50). According to 2-way ANOVA, testing difference among groups, for SDNN (p-value for age decade=0.003, for race= 0.070 and for race\*agedecade interaction=0.870); for SDANN (p-value for age decade= 0.030; p-value for race= 0.100, and for race\*agedecade interaction= 0.955); for rMSSD (p-value for age decade= <0.001, for race=0.310, and for agedecade\*race interaction= 0.383); for pNN50 (p-value for age decade= < 0.001, for race= 0.916, and for agedecade\*race interaction= 0.962).

**Figure A3. HRV measures (SDNN and SDANN) stratified by sex and mean values by age-decade and race distribution of the “Healthy” sample (n=543)**

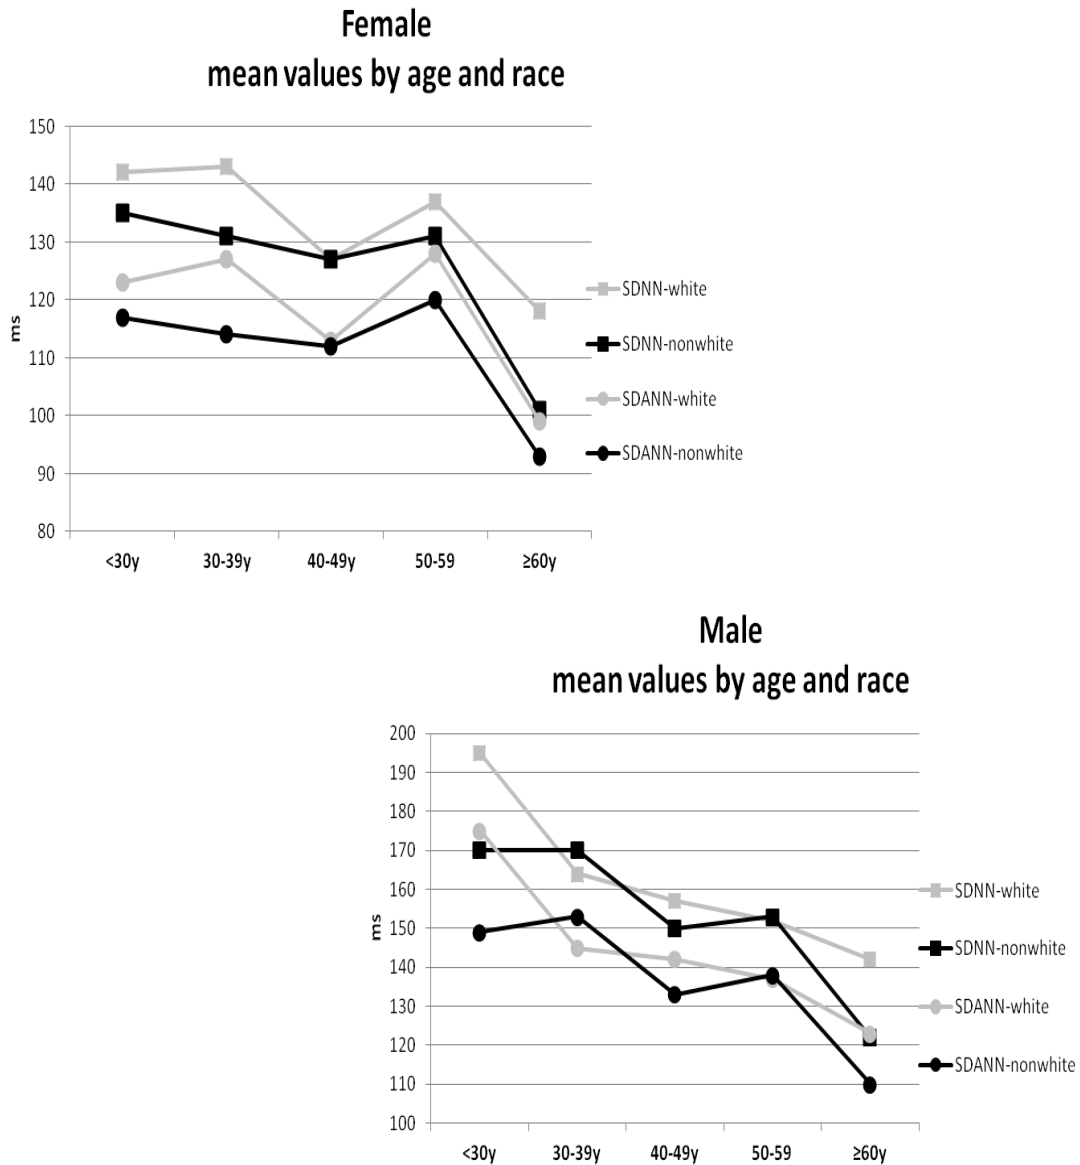

NN intervals= normal-to-normal intervals; SDNN= standard deviation of NN intervals; SDANN= standard deviation of the average of all consecutive 5-minute NN intervals; Female (n =318) and Male (n= 225); Race (white versus non-white). Female white (n= 233) and female nonwhite (n= 85). Male white (n= 169) and male nonwhite (n=56). Age ≥18 and < 30y (n= 137); age 30-39y (n= 154); age 40-49y (n= 110); age 50-59y (n= 92); age ≥60y (n= 50). Stratified analysis for SDNN (p-value for interaction agedecade\*race for female = 0.823 and for p-value for male = 0.538). P-value testing interaction (agedecade\* race\* sex) for SDNN = 0.434. Stratified analysis for SDANN (p-value for interaction agedecade\*race for female = 0.832 and for male = 0.482). P-value testing interaction (agedecade\*race\*sex) for SDANN= 0.307.

**Figure A4. HRV measures (rMSSD and pNN50) stratified by sex and mean values by age-decade and race distribution of the “Healthy” sample (n=543)**

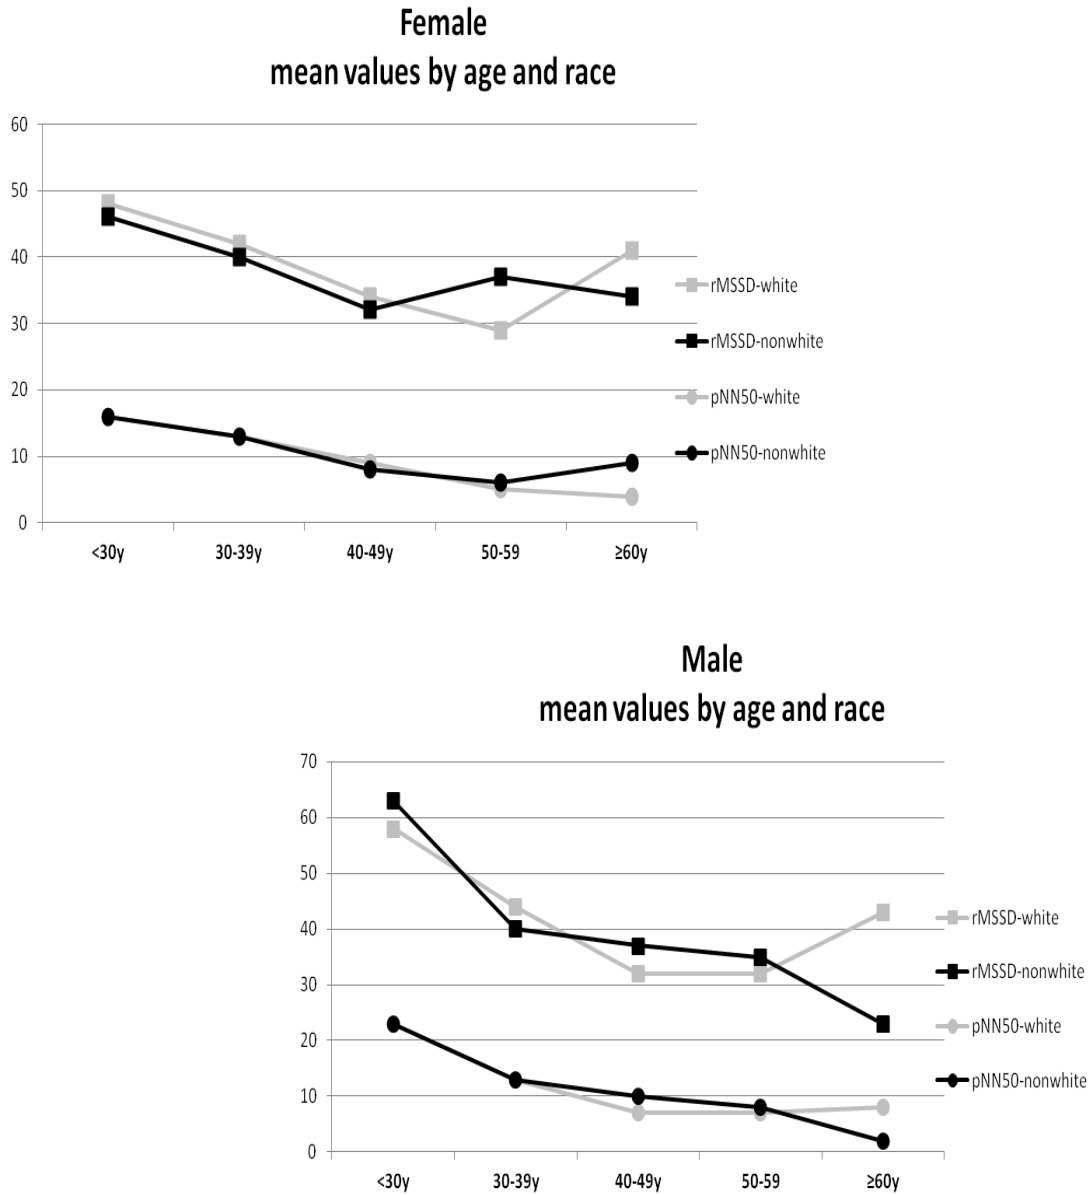

NN intervals= normal-to-normal intervals; rMSSD= root mean square of successive difference of NN intervals (unit= ms); pNN50= percentage of consecutive NN intervals that deviate from one another by more than 50 ms (unit=%). Female (n =318) and Male (n= 225); Race (white versus non-white). Female white (n= 233) and female nonwhite (n= 85). Male white (n= 169) and male nonwhite (n=56). Age ≥18 and < 30y (n= 137); age 30-39y (n= 154); age 40-49y (n= 110); age 50-59y (n= 92); age ≥60y (n= 50). Stratified analysis for rMSSD (p-value for interaction agedecade\*race for female =0.894 and p-value for male= 0.421). P-value testing interaction (agedecade\*race\*sex) for rMSSD= 0.763. Stratified analysis for pNN50 (p-value for interaction agedecade\*race for female = 0.921 and p-value for male = 0.748). P-value testing interaction (agedecade\*race\*sex) for pNN50 = 0.657.

**Figure A5. Time domain HRV measures of the rest ECG 10 min protocol sample showing mean values for lie down and standing positions.**

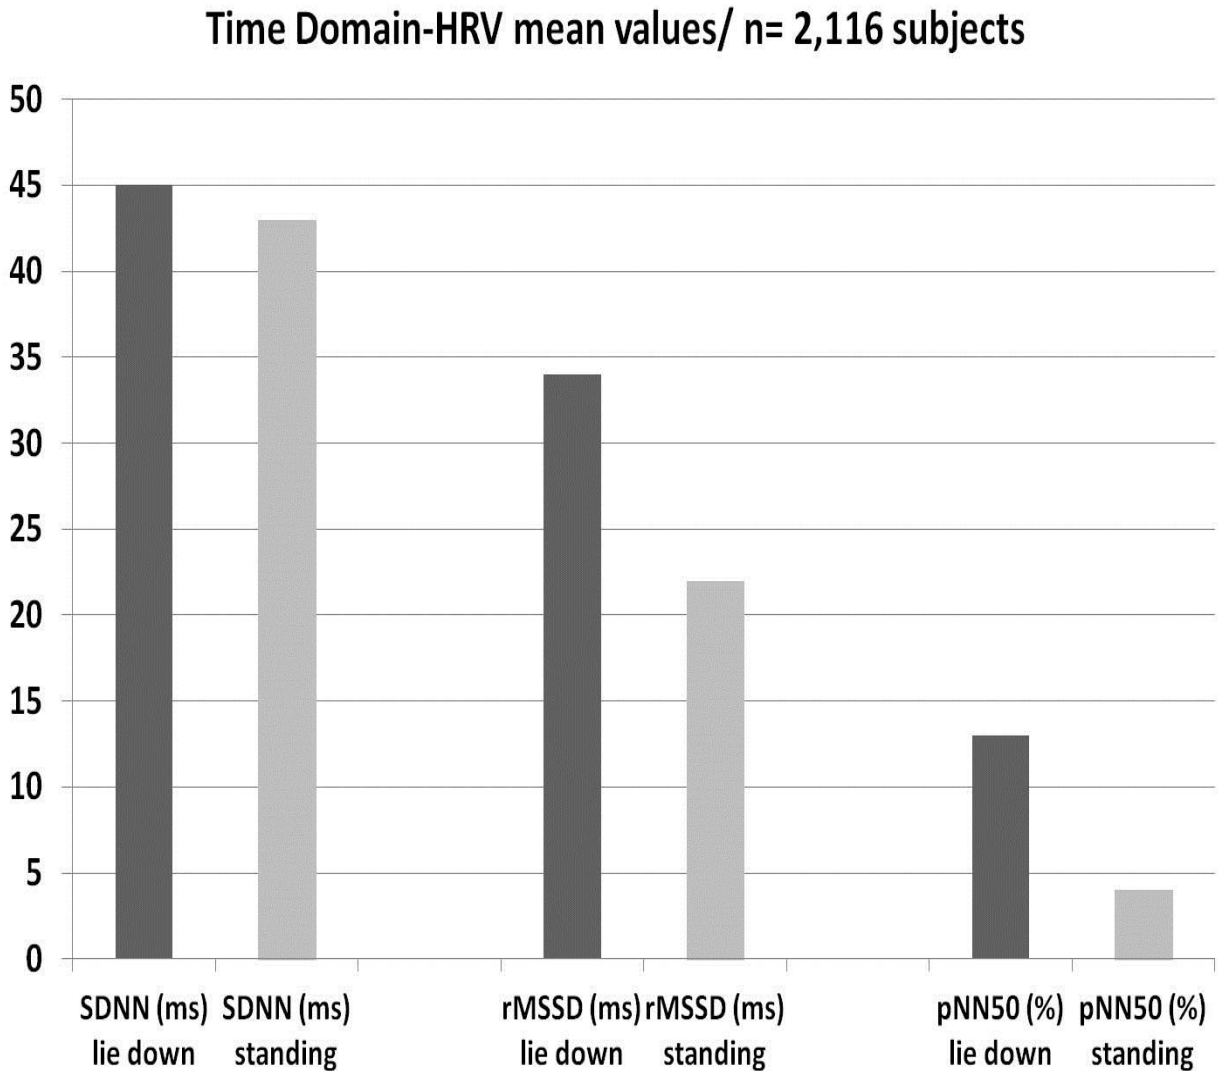

HRV= heart rate variability; SDNN index = mean of the standard deviations of all normal sinus NN intervals for all 5-min segments; rMSSD= root mean square of successive difference of NN intervals; pNN50= percentage of consecutive NN intervals that deviate from one another by more than 50 ms;



**Figure A6. Frequency domain HRV measures of the rest ECG 10 min protocol sample showing mean values for lie down and standing positions.**

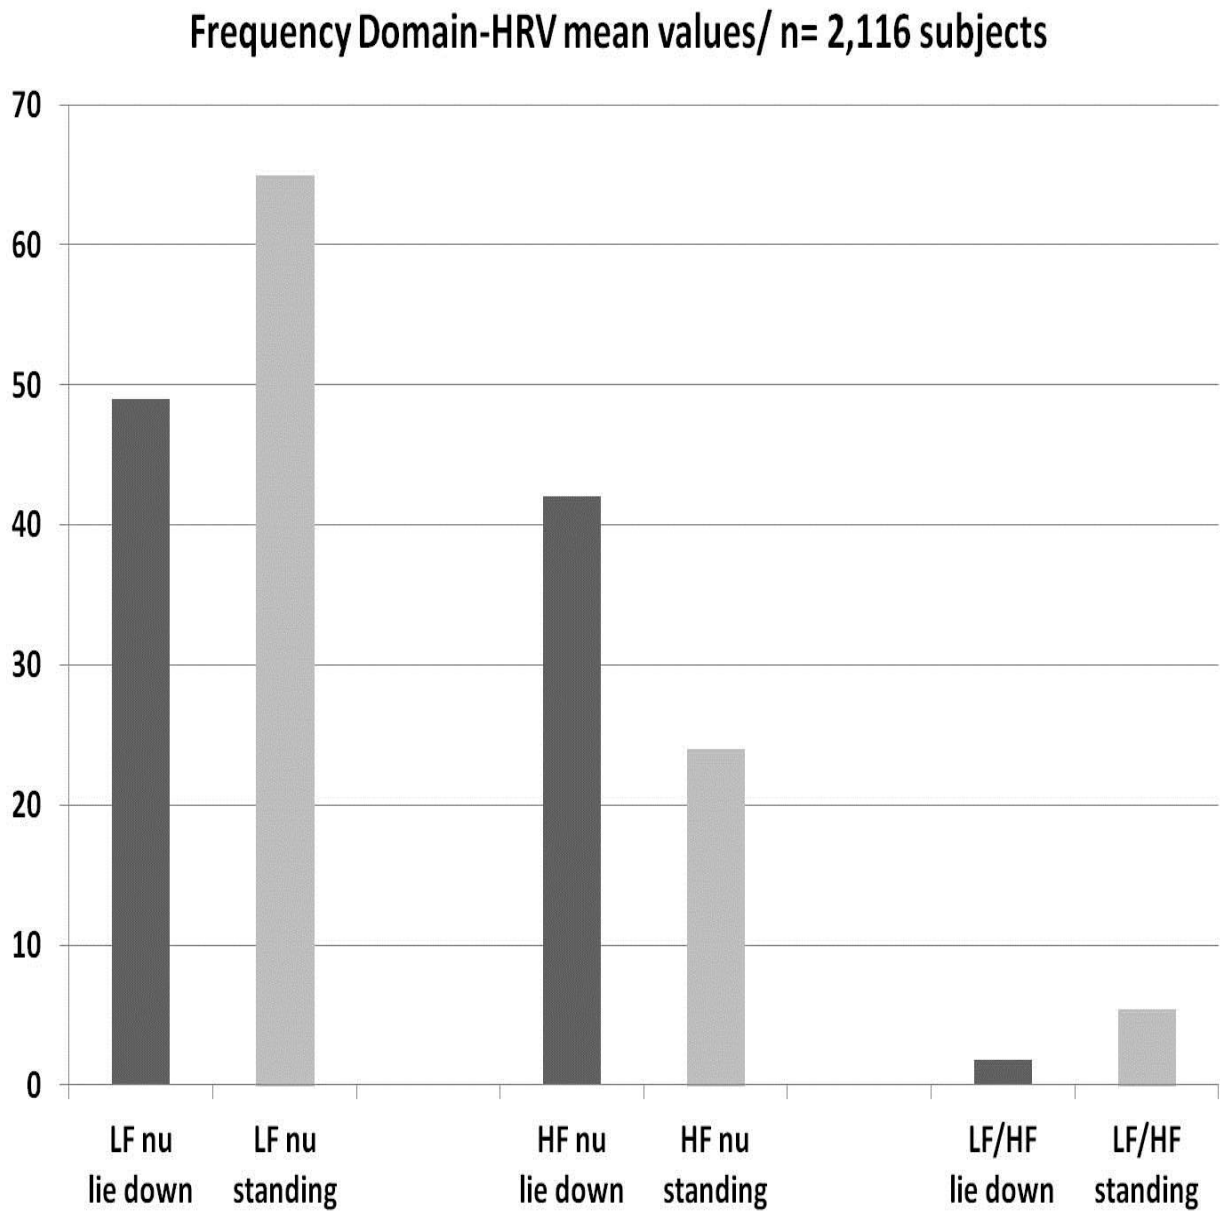

HRV= heart rate variability; LF= low-frequency power spectrum from 0.04 to 0.15 Hz; HF= high-frequency power spectrum from 0.15 to 0.40 Hz; LF/HF= low-frequency high-frequency ratio; nu= normalized units.

**Figure A7. Graphic display of the mean values by age-decade groups of the sample with rest ECG 10 min protocol (n=2,116), while lie down and standing positions.**

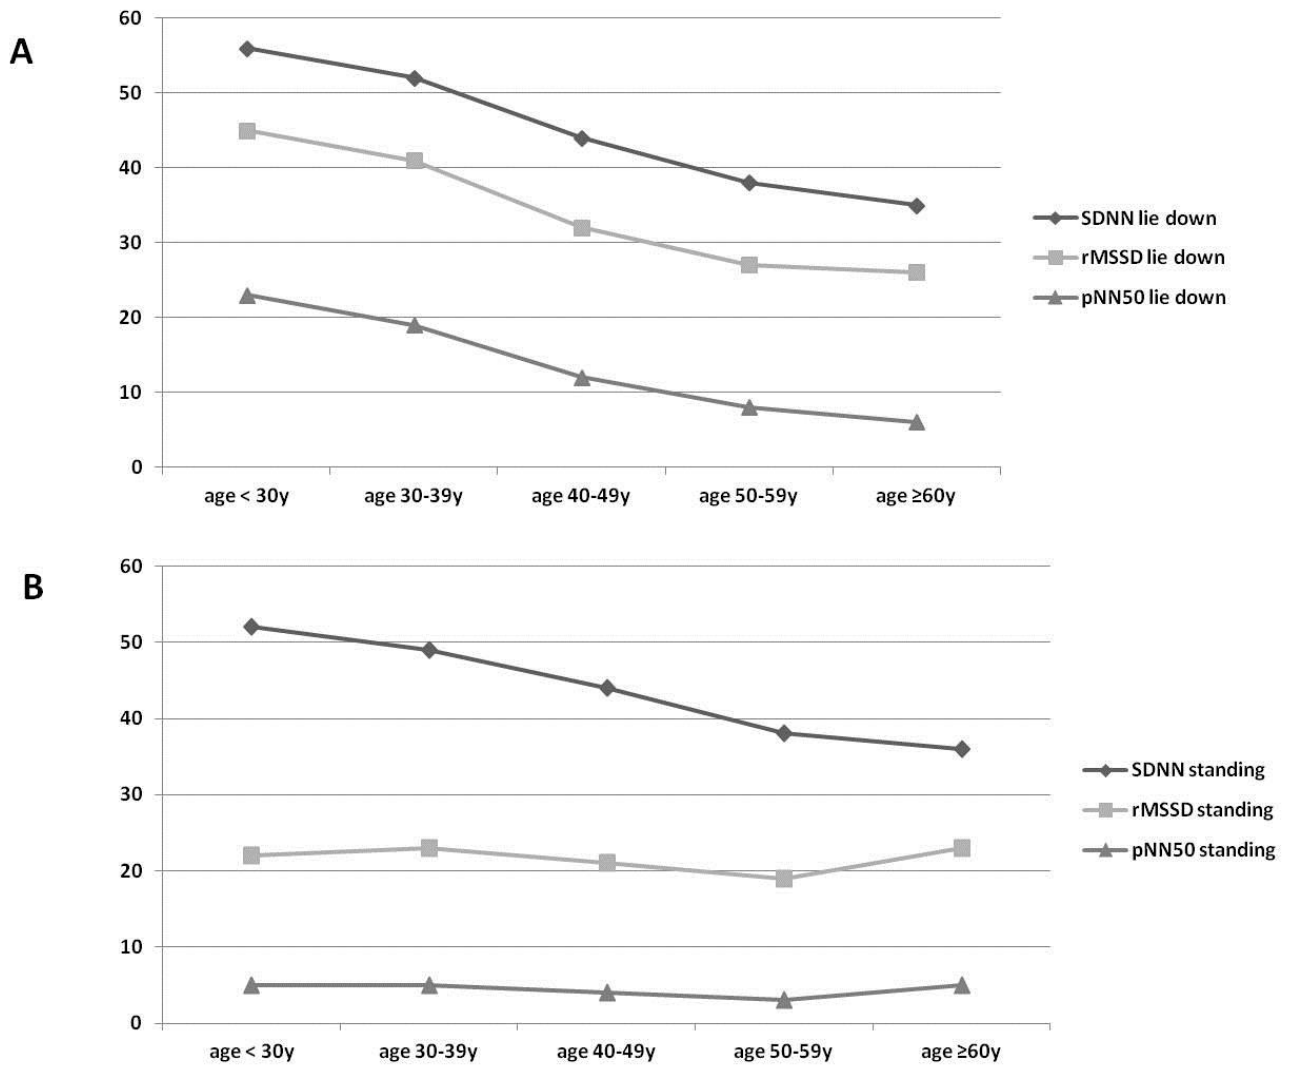

SDNN= standard deviation of NN intervals (unit= ms); rMSSD= root mean square of successive difference of NN intervals (unit= ms); pNN50= percentage of consecutive NN intervals that deviate from one another by more than 50 ms (unit= %). A represents rest ECG 10 min lie down position and B represents rest ECG 10 min standing position.

**Figure A8. Graphic display of the mean values by age-decade groups of the sample with rest ECG 10 min protocol (n=2,116), while liedown and standing positions.**

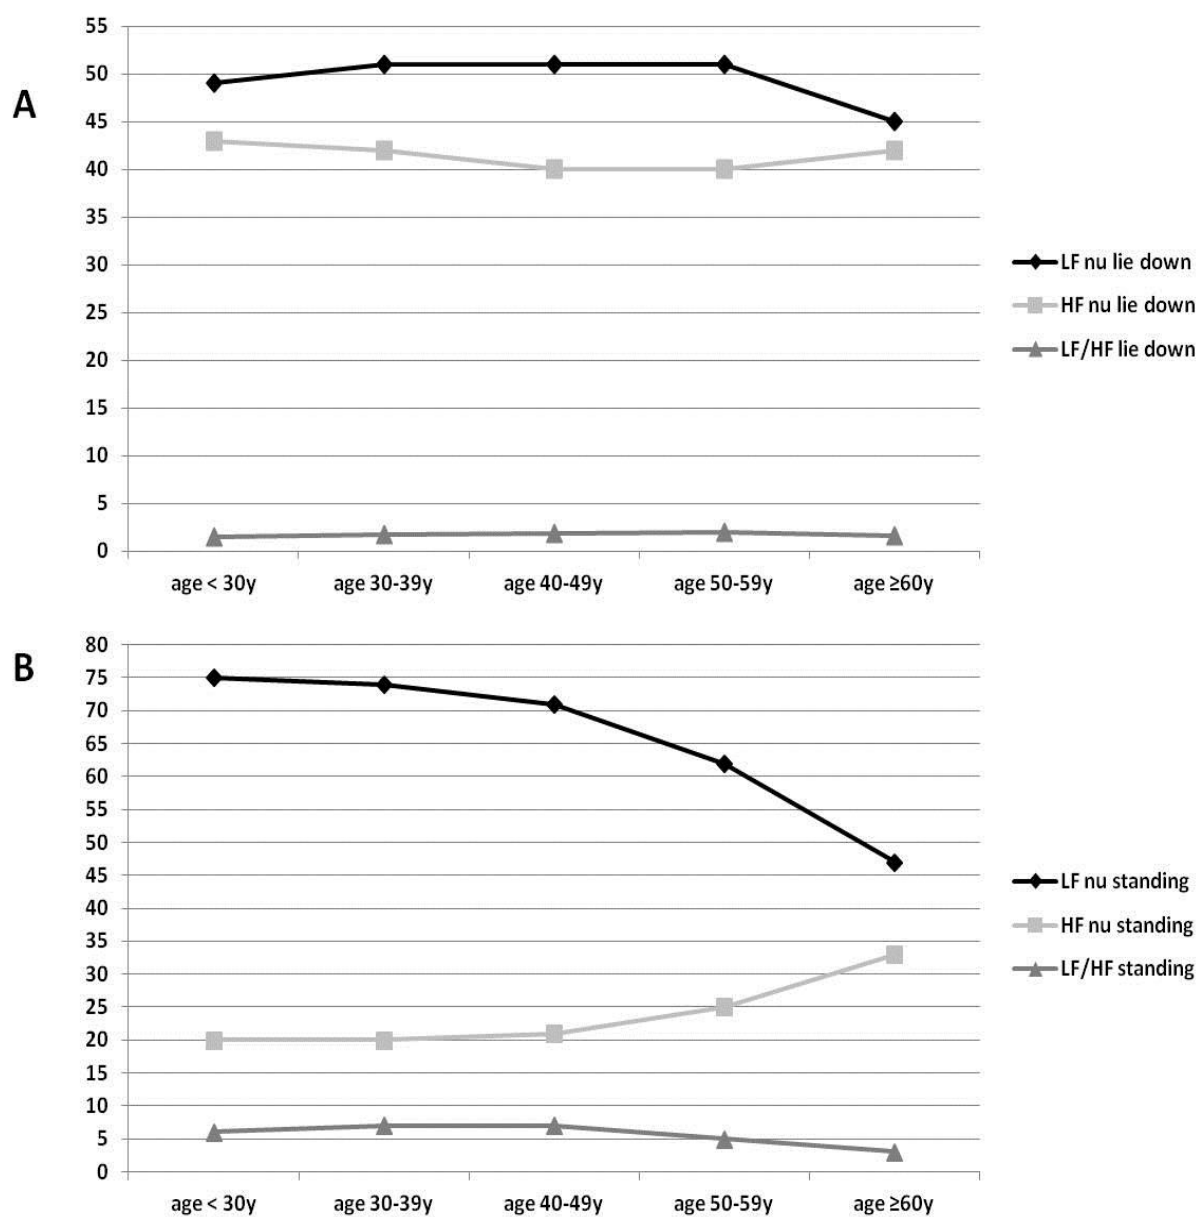

HRV= heart rate variability; LF= low-frequency power spectrum from 0.04 to 0.15 Hz; HF= high-frequency power spectrum from 0.15 to 0.40 Hz; LF/HF= low-frequency high-frequency ratio; nu= normalized units. A represents rest ECG 10 min lie down position and B represents rest ECG 10 min standing position.

**Figure A9. LOESS regression curves (SDNN) of “healthy” population from samples with rest ECG 10 min protocol and for 24h-Holter ECG**

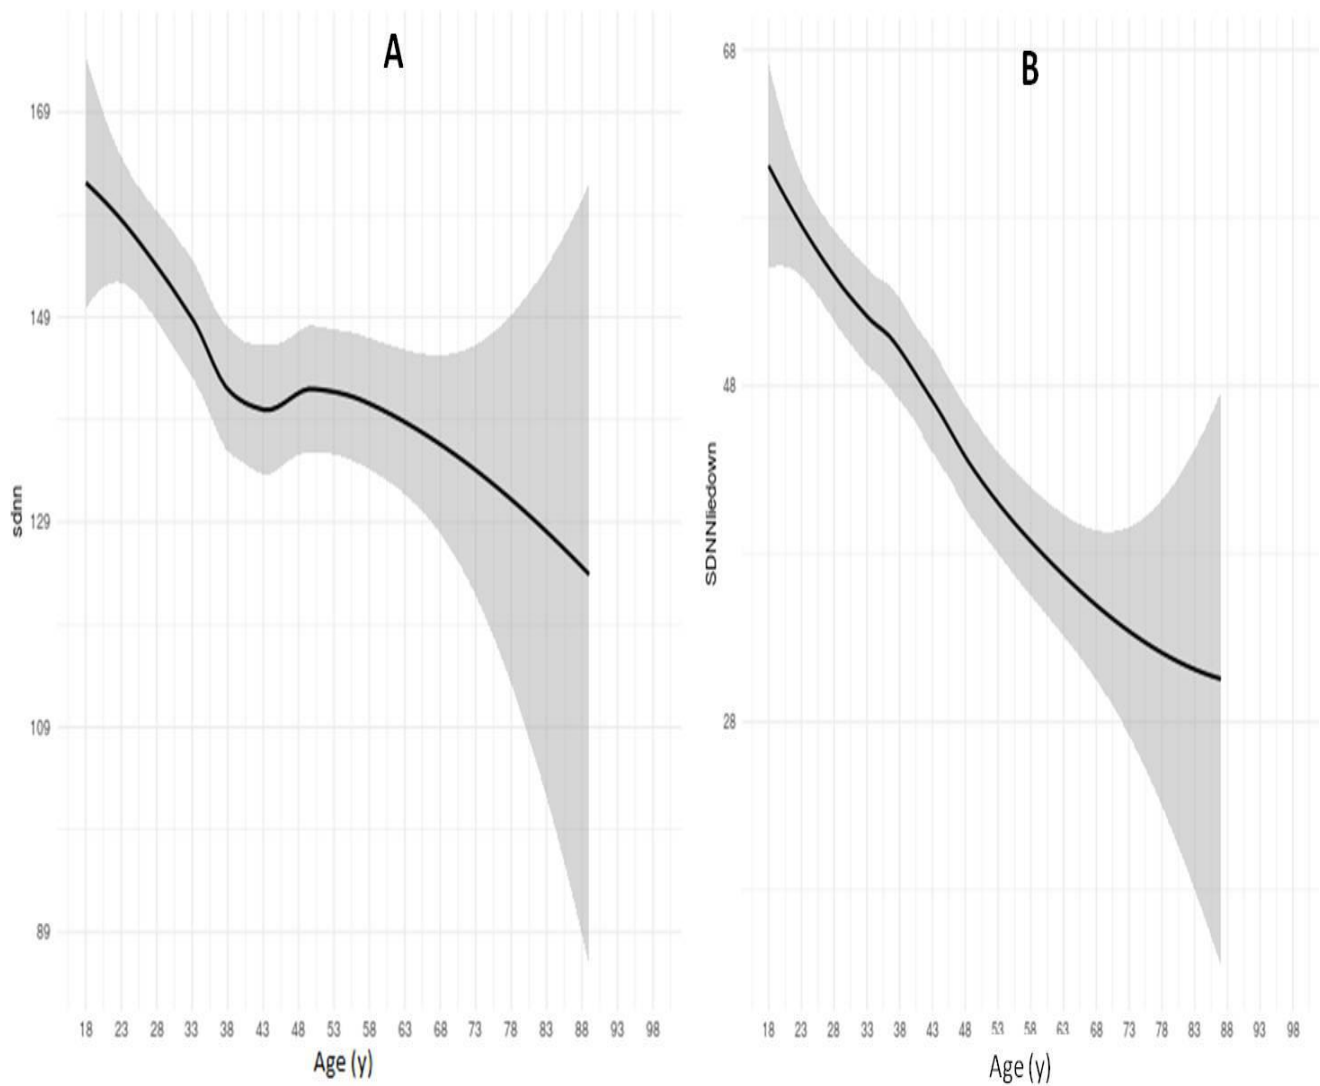

SDNN= standard deviation of NN intervals. SDNN is measured in milliseconds. A represents the healthy sample underwent to 24h-Holter ECG (n=543) and B represents the healthy sample underwent to rest ECG 10 min protocol (n= 538).

**Figure A10. LOESS regression curves (rMSSD) of “healthy” population from samples with rest ECG 10 min protocol and for 24h-Holter ECG**

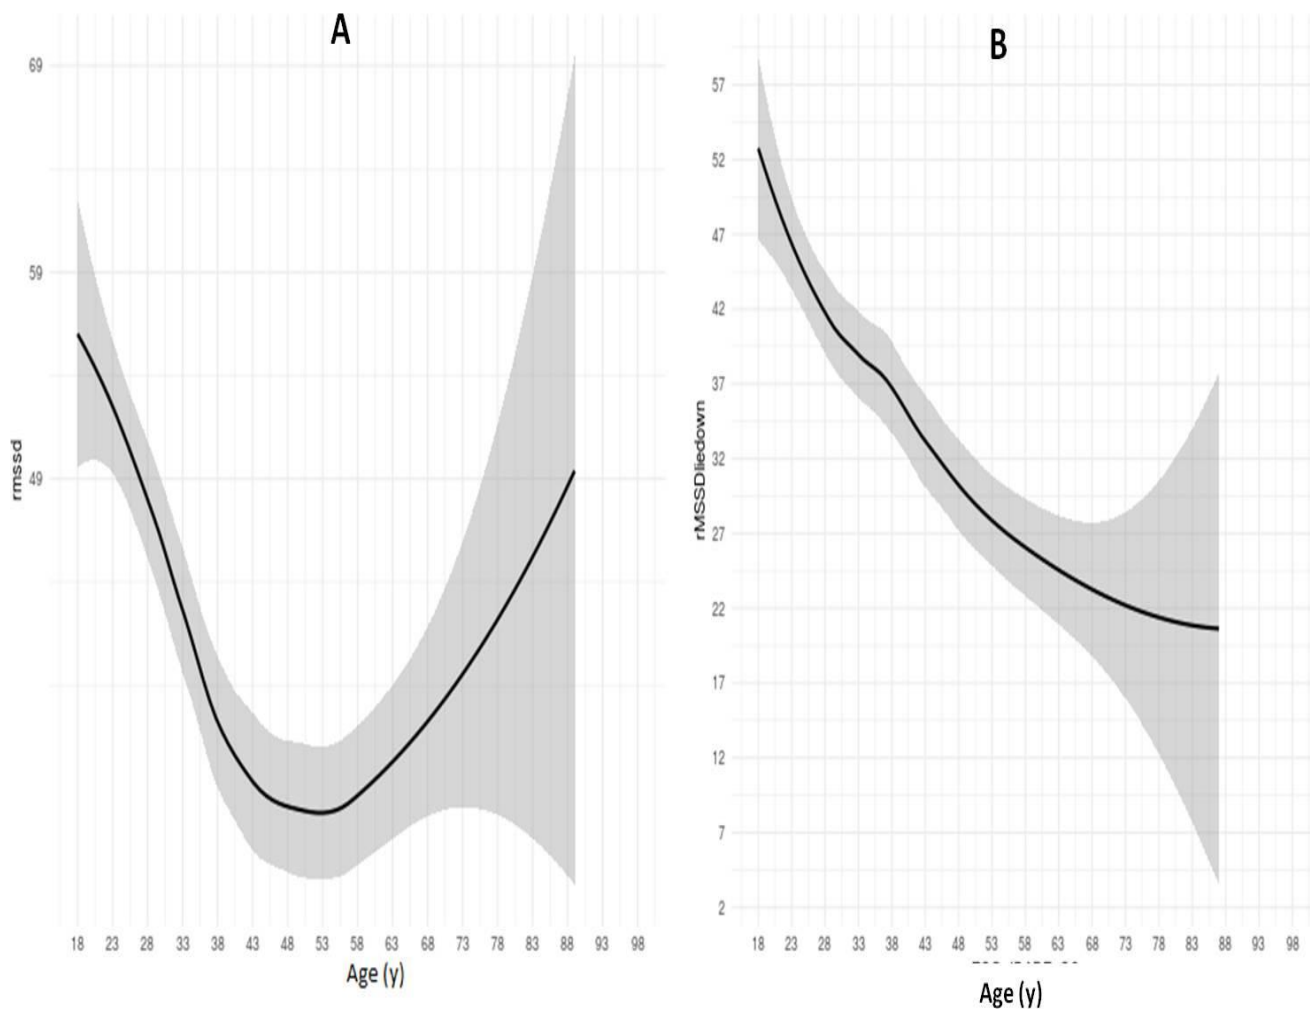

rMSSD= root mean square of successive difference of NN intervals; rMSSD is measured in milliseconds.

A represents the healthy sample underwent to 24h-Holter ECG (n=543) and B represents the healthy sample underwent to rest ECG 10 min protocol (n= 538).

**Figure A11. LOESS regression curves (pNN50) of “healthy” population from samples with rest ECG 10 min protocol and for 24h-Holter ECG**

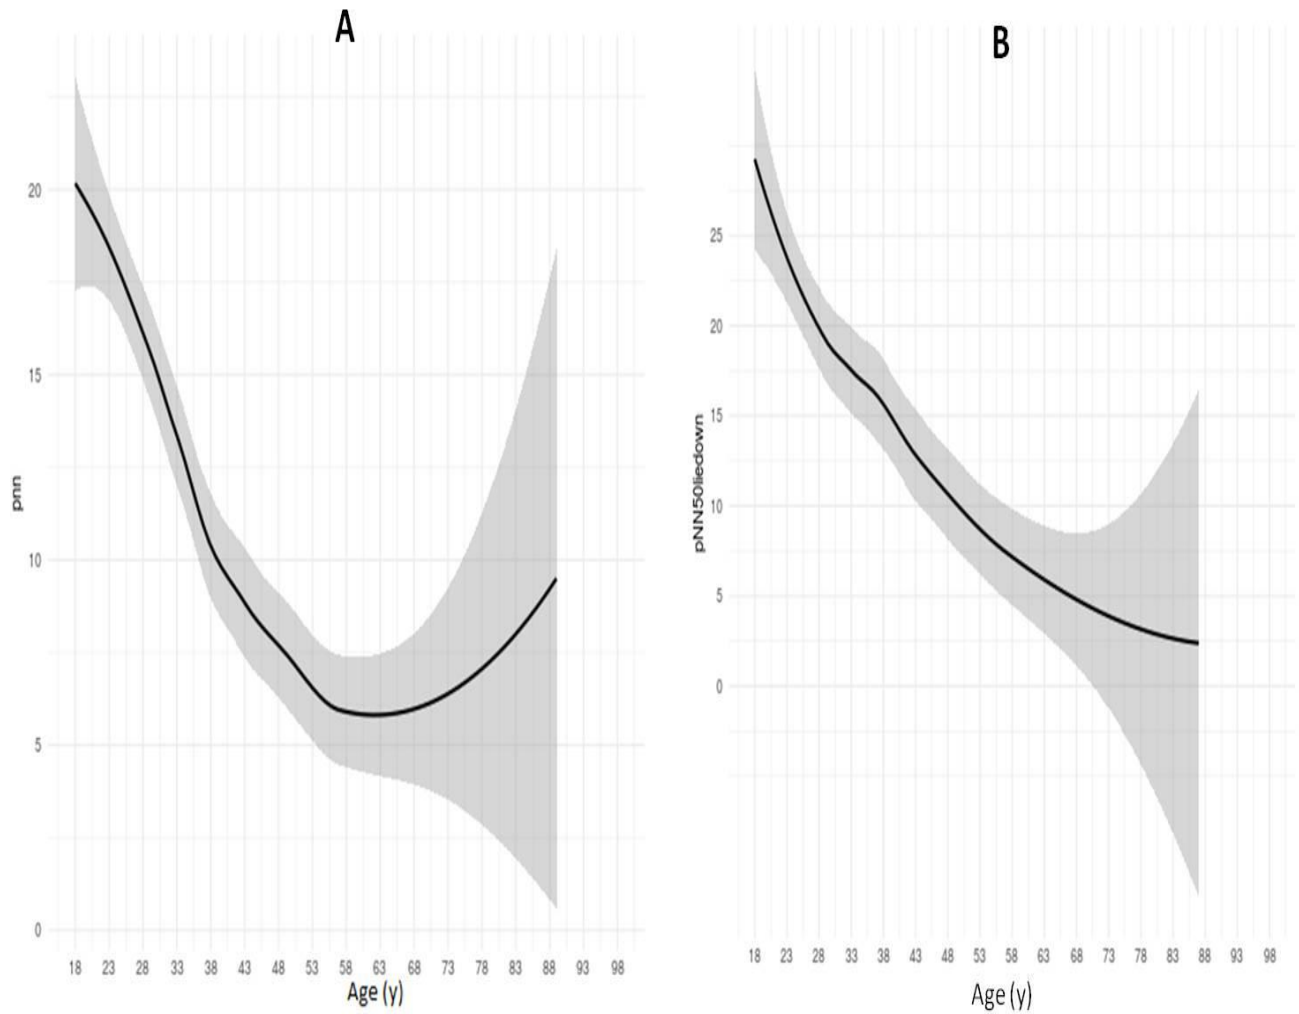

pNN50= percentage of consecutive NN intervals that deviate from one another by more than 50 ms.  
pNN50 is measured in percentage. A represents the healthy sample underwent to 24h-Holter ECG (n=543) and B represents the healthy sample underwent to rest ECG 10 min protocol (n= 538).
